# Supplementary material for: Generate TALE/TALEN as Easily and Rapidly as Generating CRISPR
Source: PubMed Central journal article supplement — Mol Ther Methods Clin Dev. 2019 Feb 19;13:310–20. doi: 10.1016/j.omtm.2019.02.004 (PMC6423989; doi:10.1016/j.omtm.2019.02.004), 2019-02-19
Supplement: mmc1.pdf [file mmc1.pdf]

**OMTM, Volume 13**

**Supplemental Information**

**Generate TALE/TALEN as Easily and Rapidly  
as Generating CRISPR**

**Shuyan Zhang, Huiting Chen, and Jinke Wang**

## Supplementary information

### Reagents used in this study and their manufacturers

The plasmids pIRES2-EGFP, pcDNA-dCas9-VP64, pcDNA-dCas9-VPR, pEGFP-C1, and pEZX-miniCMV-ZsGreen were kept by our laboratory. The Golden Gate TALEN and TAL Effector Kit 2.0 was purchased from Addgene. PrimeSTAR® HS (Premix), Premix Taq™ (TaKaRa Taq™ Version 2.0), DNA Markers, cDNA reverse transcription kit, and some restriction endonucleases, including EcoRI, XhoI, HindIII, and NotI, were purchased from Takara. BsaI, BsmBI, and T4 DNA Ligase were purchased from New England Biolabs (NEB). The plasmid-safe nuclease was purchased from Epicentre Biotechnologies. Lipofectamine™ 2000, Opti-MEM, DAPI, and Trizol were purchased from Invitrogen. The Endo-Free Plasmid kit was purchased from CWBio. Diethylpyrocarbonate (DEPC) was purchased from Sigma. 293T, HepG2, and PANC1 cells were purchased from the Shanghai Institutes for Biological Sciences, Chinese Academy of Sciences (CAS). All oligonucleotides were manufactured by Sangon Biotech (Shanghai). The MinElute Gel Extraction kit and QIAprep Spin Miniprep Kit were purchased from Qiagen. The FastKing RT Kit (with gDNase), the Cell Counting Kit-8 (CCK8) and the competent *E. coli* DH5α were purchased from Tiangen. The fetal bovine serum (FBS) was purchased from HyClone. The Fast SYBR® Green Master Mix was purchased from Applied Biosystems (ABI). The transwell was purchased from Corning. Fibronectin was purchased from Becton Dickinson (BD).

Table S1. Primers for TALE monomers amplification and clony PCR

| Name        | Sequence (5'-3')                                                                                             | Usage                                           |
|-------------|--------------------------------------------------------------------------------------------------------------|-------------------------------------------------|
| PCR-TAL-F   | TATCATCATGCCTCCTCTAGAG                                                                                       | monomer amplification<br>(universal primers)    |
| PCR-TAL-R   | TTGGTCATGGGTGGCTCGAGG                                                                                        |                                                 |
| PCR-TAL-F1  | TATCATCATGCCTCCTCTAGAGGTCTCCCTATCTTAAAC<br>CGGCCAACATAACCGTCTCCCCCTGAACCTGACCCCG<br>GACCAAGTGGTGGCTATCGCCAGC | First monomer amplification                     |
| PCR-TAL-R5  | TTGGTCATGGGTGGCTCGAGGGTCTCCATA<br>GAGTCTGTCTTTCCCCTTTCCCGTCTCCTGCACCG                                        | Fifth monomer amplification                     |
| PCR-TAL-F6  | TATCATCATGCCTCCTCTAGAGGTCTCCCTATCTTAAAC<br>CGGCCAACATAACCGTCTCGTGCAGCGGC                                     | Sixth monomer amplification                     |
| PCR-TAL-R10 | TTGGTCATGG GTGGCTCGAGGGTCTCCATA<br>GAGTCTGTCTTTCCCCTTTCCCGTCTCCCGCC                                          | Tenth monomer amplification                     |
| PCR-TAL-R14 | TTGGTCATGG GTGGCTCGAGGGTCTCCTCG<br>AAGTCTGTCTTTCCCCTTTCCCGTCTCCAACAGCCG                                      | Fourteenth monomer<br>amplification             |
| PCR-TAL-F15 | TATCATCATGCCTCCTCTAGAGGTCTCCTCGACTTAAAC<br>CGGCCAACATAACCGTCTCCTGTTGCCGG                                     | Fifteenth monomer amplification                 |
| PCR-TAL-F18 | TATCATCATGCCTCCTCTAGAGGTCTCGCTATCGCCAGC                                                                      | Eighteenth monomer<br>amplification             |
| PCR-TAL-R18 | TTGGTCATGGGTGGCTCGAGGGTCTCTCGAAGTCTGT<br>CTTTCCCCTTTCCCGTCTCTCGTTGGTCAAC                                     | Eighteenth monomer<br>amplification             |
| TAL-F       | TTGGCGTCGGCAAACAGTGG                                                                                         | Colony PCR amplification and<br>TALE sequencing |
| TAL-R       | GGCGACGAGGTGGTCGTTGG                                                                                         | Colony PCR amplification and<br>TALE sequencing |

Table S2. Oligonucleotides used as templates for amplifying two linker monomers

| Name                | Encoded chain sequence (5'-3')                                                                                                                                |
|---------------------|---------------------------------------------------------------------------------------------------------------------------------------------------------------|
| DNA <sub>10.5</sub> | TATCATCATGCCTCCTCTAGAGGTCTCCTCGACTTAAACCGGCCAACATACCCGTCTCTGGCG<br>GCAAGCAAGCGCTCGAAACGGTGCAGCGGCTGTTGCCGGTGCTGTGCCAGGACCATGGCCG<br>AGACCCTCGAGCCACCCATGACCAA |
| DNA <sub>17.5</sub> | TATCATCATGCCTCCTCTAGAGGTCTCCGAAACGGTGCAGCGGCTGTTGCCGGTGCTGTGCC<br>AGGACCATGGCCTGACCCCGGACCAAGTGGTGGCTATCGAGACCCTCGAGCCACCCATGAC<br>CAA                        |

Table S3. Primers for constructing TALE backbones and fluorescence reporter construct

| Name             | Sequence (5'-3')                                             | Usage                                |
|------------------|--------------------------------------------------------------|--------------------------------------|
| VP64-F           | CCGGAATTCAGCGCTGGAGGAGGTGGAAG                                | VP64 amplification                   |
| VP64-R           | AAGGAAAAAAGCGGCCGCTCAGTTAATCAGCATGTC                         |                                      |
| VPR-F            | CCGGAATTCGACGCATTGGACGATTTTGATCTGGATAT<br>GCTGGGAAGTG        | VPR amplification                    |
| VPR-R            | AAGGAAAAAAGCGGCCGCAAACAGAGATGTGTGCGAA<br>GATGGACAGTCCTGTGCTG |                                      |
| HNF4 $\alpha$ -F | CCGCTCGAGTGAGATCCAAAACCTGAGAC                                | HNF4 $\alpha$ promoter amplification |
| HNF4 $\alpha$ -R | CCCAAGCTTAAGCCCACCCAGCCGGAGAG                                |                                      |
| E47-F            | CCGCTCGAGGCTCAGTAGC CACCAACCACC                              | E47 promoter amplification           |
| E47-R            | CCCAAGCTTTCTGTGGAG GGGAGCTGGTAAG                             |                                      |

Table S4. Primers for qPCR detection of gene expression

| Name             | Forward primer (5'-3')     | Reverse primer (5'-3') |
|------------------|----------------------------|------------------------|
| GS               | CCTGCTTGATGCTGGAGTC        | GAAAAGTCGTTGATGTTGGA   |
| APOCIII          | GGTACTCCTTGTGTGTC          | AAATCCCAGAAGCTCAGAGAAC |
| CYP1 $\alpha$ 2  | CTGGCCTCTGCCATCTTCTG       | TTAGCCTCCTTGCTCACATGC  |
| G-6-P            | GGCTCCATGACTGTGGGATC       | TTCAGCTGCACAGCCCAGAA   |
| PEPCK            | GTGTCCCTCTAGTCTATGAAGC     | ATTGACTTGATCCTCCAGATAC |
| BR               | ACAAGGTGCTGCGGGAATCA       | ACTGGTGGGAGGGGTAGGTG   |
| ALDOB            | AGGAGGACTCTTCTCTCCCAA      | GATTCATCTGCAGCCAGGAT   |
| APOAI            | GCCTTGGGAAAACAGCTAAA       | AGGCCCTCTGTCTCCTTTTC   |
| GYS2             | CCAGTGGGAAGTCGAAGAAC       | TTCTCTCCCCATTCATCTGC   |
| HPD              | TTGGGAAGGTGAAGTTTGCT       | GCATTTGGGCAGTTTAGGAA   |
| CD133            | ACATGAAAAGACCTGGGGG        | GATCTGGTGT CCCAGCATG   |
| CD90             | CGGAAGACCCCAGTCCA          | ACGAAGGCTCTGGTCCACTA   |
| Oct3/4           | CGACCATCTGCCGCTTTGAG       | CCCCCTGTCCCCCATTCCTA   |
| SMO              | ATCTCCACAGGAGAGACTGGTTCCGG | AAAGTGGGGCCTTGGAACATG  |
| $\beta$ -catenin | AGGTCTGAGGAGCAGCTTCA       | ATTGTCCACGCTGGATTTTC   |
| Bmi              | GGAGACCAGCAAGTATTGTCTATTT  | CATTGTCGCTGGGCATCGTAAG |
| LIN28            | TGTAAGTGGTTCAACGTGCG       | CCTCACCTCCTTCAAGCTC    |
| c-Myc            | GCTGCTTAGACGCTGGATTT       | CTCCTCCTCGTCGCAGTAGA   |
| Klf4             | GCGGCAAACCTACACAAAAG       | CCCCGTGTGTTTACGGTAGT   |
| Sox2             | GCGAACCATCTCTGTGGTCT       | GGAAAGTTGGGATCGAACAA   |
| ESG1             | GCGCAGTATCACAGCCTTAAA      | TCAATCTCTTGGCGATTCA    |
| NANOG            | GATTTGTGGGCCTGAAGAAA       | TTGGGACTGGTGAAGAATC    |
| $\beta$ -actin   | CCTGGCACCCAGCACAAAT        | GGGCCGGACTCGTCATACT    |
| P21              | GGATGTCCGTCAGAACCCAT       | CCCTCCAGTGGTGTCTCGGTG  |
| TP53INP1         | AAACCTTCTCATTGAACATCCC     | CCATTGTGCTTGACTTGCC    |
| HNF6             | AACCCTGGAGCAAACCTCAA       | AAGACCAACCTGGGCTTTTT   |
| Cx32             | CTGCAGACATTCTCTGGGAAA      | GCACCATGATTCTGAAGATGA  |
| Top2a            | GGGTAGCAATAATCTAAACCT      | CCAGTTCTTCAATAGTACCCT  |
| Aurka            | TCTAGTCCCTTAACCACTTATCT    | GACACATGGCCTCTTCTGTATC |
| MIST1            | CCAGCACTACCAGCAGCA         | AGGACTGGGCGCTAGGTG     |
| Sox9             | CACCCGGATTACAAGTACCAG      | AAGGTCTCGATGTTGGAGATG  |

Table S5. Target sequences of TALENs

| Name              | Sequence (5'-3')   | Usage      |
|-------------------|--------------------|------------|
| Left-HNF4a-TALEN  | AATGCTCCGGGCTGGCA  | edit HNF4a |
| Right-HNF4a-TALEN | GGGGCGGGGAGGGCCGAG |            |
| Left-E47-TALEN    | AACCCCGCCGGGCACATG | edit E47   |
| Right-E47-TALEN   | GAAAGCGGGTGGCTCGTC |            |

Table S6. Primers amplifying HOM-HNF4a-ZsGreen and HOM-E47-ZsGreen

| Name        | Sequence (5'-3')                                                                                    | Usage                              |
|-------------|-----------------------------------------------------------------------------------------------------|------------------------------------|
| HOM-HNF4a-F | CTACTGCAGGCTCAAGAAATGCTTCCGGGCTGG<br>CAGGAGGAGGTTCCGGTGGAGGTGGTTCTGGA<br>ATGGCCCAGTCCAAGCACGGCCTGA  | HOM-HNF4a-ZsGreen<br>amplification |
| HOM-HNF4a-R | GGTGGGGCAG TGGTGGTGGG GCGGGGAGGG<br>CCGAG TTAGGGCAAGGCGGAGCCGGAGGCG                                 |                                    |
| HOM-E47-F   | GCCTGAGCGAAGCCCACAACCCCGCCGGGCAC<br>ATGGGAGGAGGTTCCGGTGGAGGTGGTTCTGG<br>A ATGGCCCAGTCCAAGCACGGCCTGA | HOM-E47-ZsGreen<br>amplification   |
| HOM-E47-R   | GGCCAGAGCA CAGGGCTGAA AGCGGGTGGC<br>TCGTCTTAGGGCAAGGCGGAGCCGGAGGCG                                  |                                    |



**a** Golden Gate TALEN and TAL Effector Kit 2.0 Plate Map

|   | 1       | 2        | 3      | 4         | 5         | 6       | 7       | 8       | 9       | 10      | 11      | 12      |
|---|---------|----------|--------|-----------|-----------|---------|---------|---------|---------|---------|---------|---------|
| A | pHD1    | pHD2     | pHD3   | pHD4      | pHD5      | pHD6    | pHD7    | pHD8    | pHD9    | pHD10   | pNG1    | pNG2    |
| B | pNG3    | pNG4     | pNG5   | pNG6      | pNG7      | pNG8    | pNG9    | pNG10   | pNI1    | pNI2    | pNI3    | pNI4    |
| C | pNI5    | pNI6     | pNI7   | pNI8      | pNI9      | pNI10   | pNN1    | pNN2    | pNN3    | pNN4    | pNN5    | pNN6    |
| D | pNN8    | pNN8     | pNN9   | pNN10     | pNK1      | pNK2    | pNK3    | pNK4    | pNK5    | pNK6    | pNK7    | pNK8    |
| E | pNK9    | pNK10    | pNH1   | pNH2      | pNH3      | pNH4    | pNH5    | pNH6    | pNH7    | pNH8    | pNH9    | pNH10   |
| F | pLR-HD  | pLR-NG   | pLR-NI | pLR-NN    | pFUS_B1   | pFUS_B2 | pFUS_B3 | pFUS_B4 | pFUS_B5 | pFUS_B6 | pFUS_B7 | pFUS_B8 |
| G | pFUS_B9 | pFUS_B10 | pFUS_A | pFUS_A30A | pFUS_A30B | pLR-NH  | pTAL1   | pTAL2   | pTAL3   | pTAL4   | pZHY500 | pZHY501 |
| H | pCP5b   | pKEB31   |        |           |           |         |         |         |         |         |         |         |

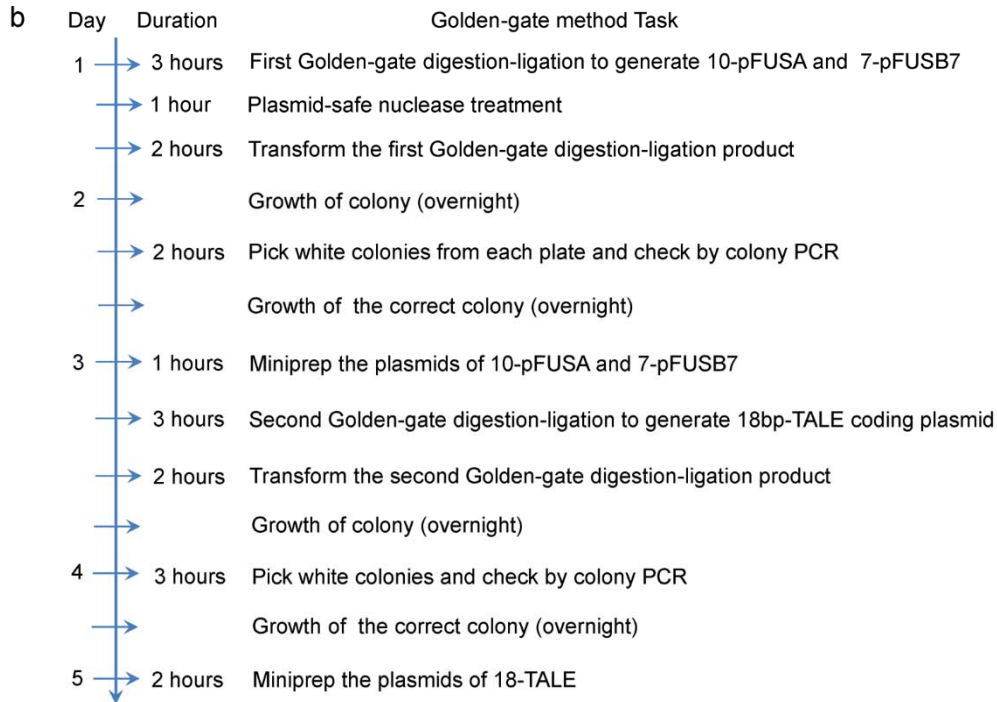

Figure S1. Golden Gate TALEN and TAL Effector Kit 2.0 (Addgene). (a) Plasmid 96-well plate of Addgene kit 2.0. Plasmids were provided as transformed *E.coli* DH5 $\alpha$ . (b) Pipeline for constructing TALE with Addgene kit 2.0. This scheme shows an example for constructing a TALE that can bind a target site at the length of 18 bp. 10-pFUSA, a plasmid prepared with 10 monomer plasmids and one receptor plasmid pFUSA in a Golden-gate digestion-ligation reaction; 7-pFUSB7, a plasmid prepared with 7 monomer plasmids and one receptor plasmid pFUSB7 in a Golden-gate digestion-ligation reaction. As a result, 10-pFUSA codes the amino acid binding the N1–N10 nucleotides and 7-pFUSB7 codes the amino acid binding the N11–N17 nucleotides. The nucleotides coding the amino acid binding the last nucleotide (N18) are contained in another monomer plasmid (pLR). The second Golden-gate digestion-ligation reaction contains four plasmids including 10-pFUSA, 7-pFUSB7, pLR, and a TALE backborn vector (pTAL1).

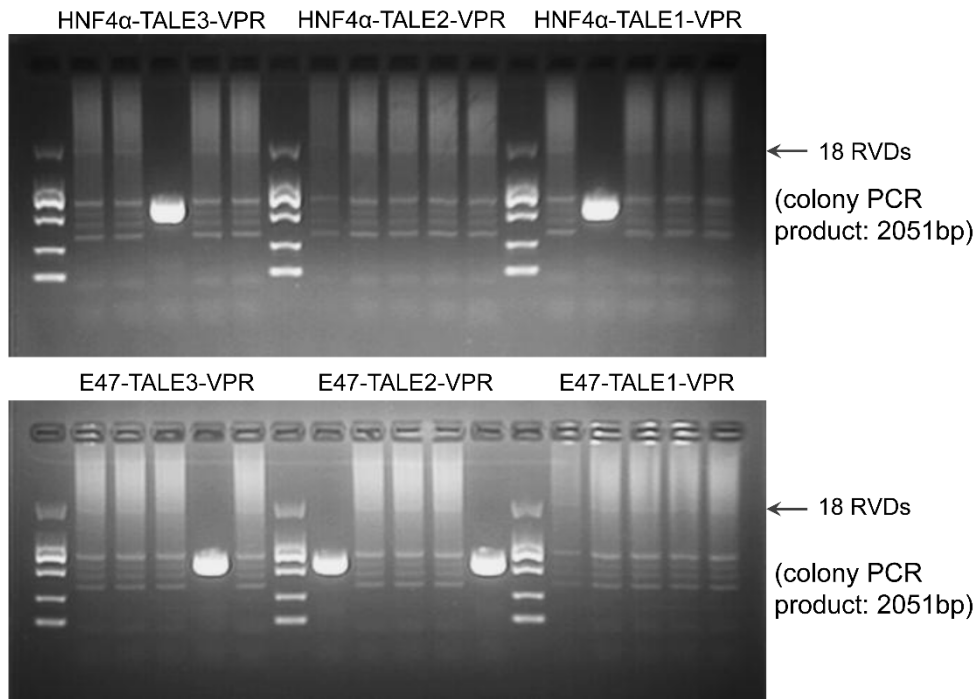

Figure S2. Detection of final TALE-VPR colonies with colony PCR. Full-length PCR products are often less prominent while the "ladder effect" represents a robust indicator of successful assembly. DNA Marker: DL2000 mark. Randomly picked white spots were detected with by colony PCR colony PCR, which indicated that most white spots are correctly assembled TALEs.

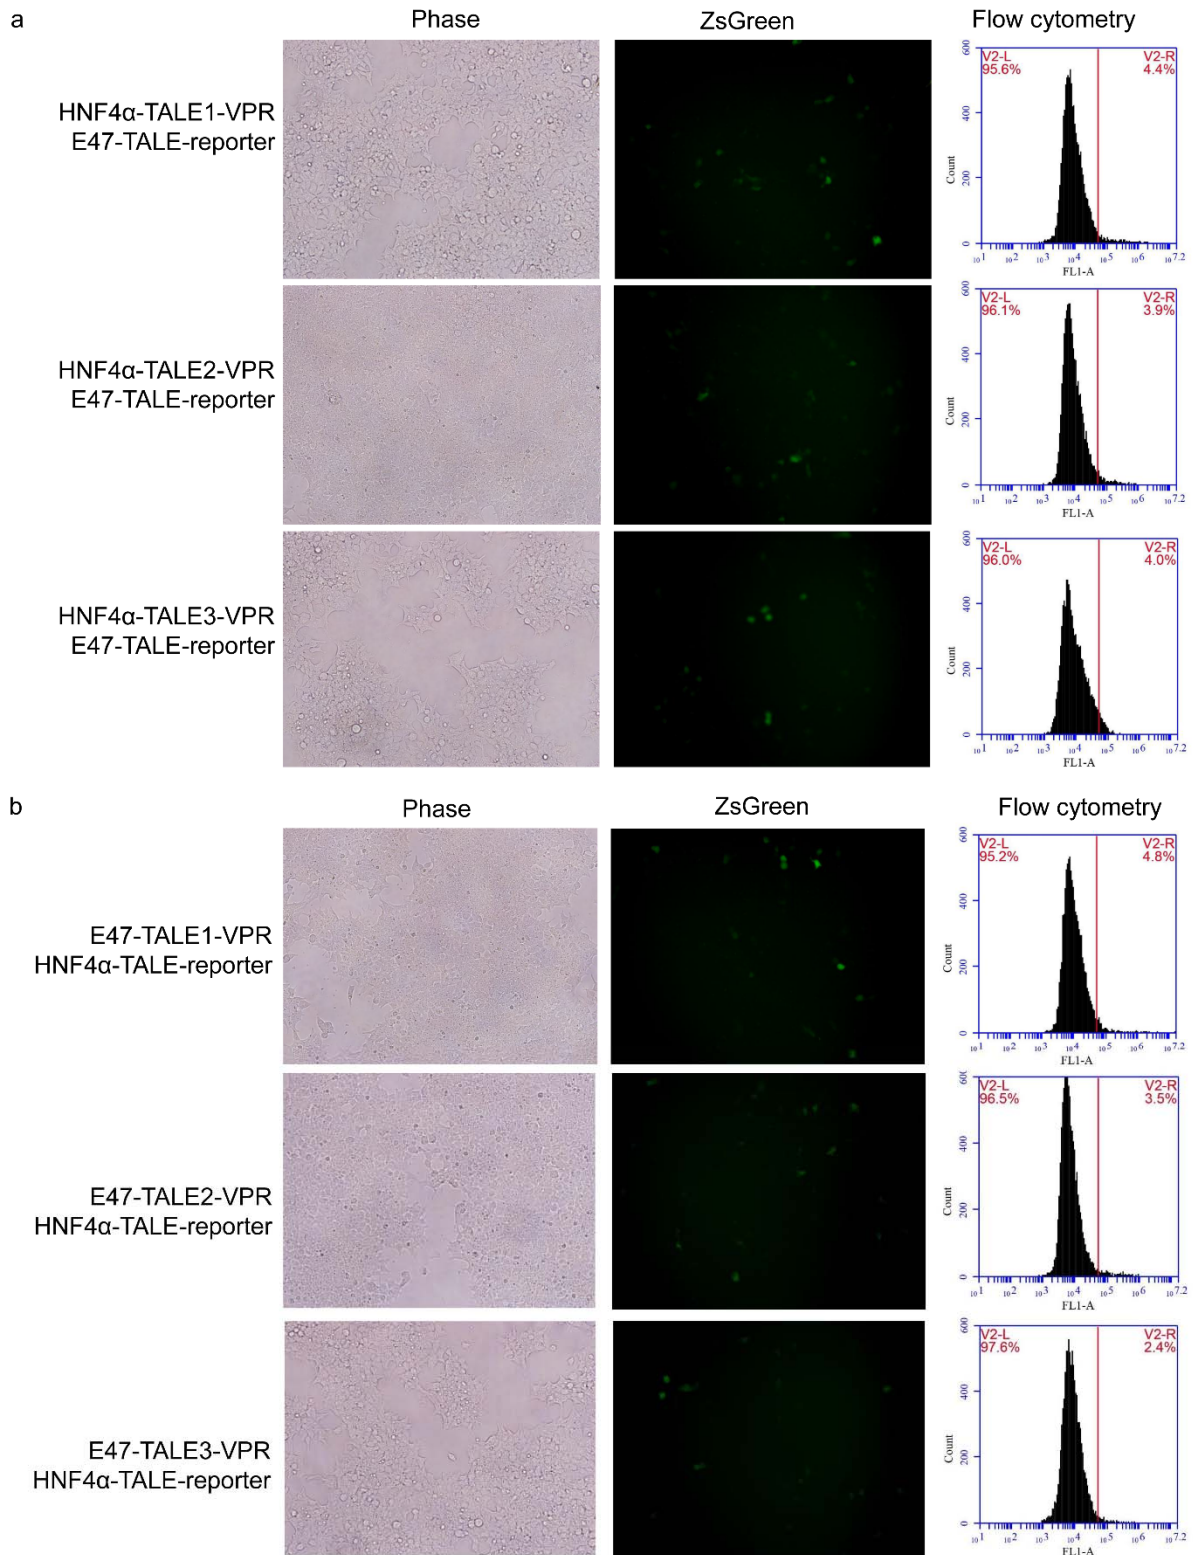

Figure S3. Activating exogenous reporter gene with TALEs. 293T cells were co-transfected with a TALE-VPR plasmid and its unrelated corresponding reporter plasmid expressing ZsGreen. (a) Cells co-transfected with HNF4 $\alpha$ -TALE1/2/3-VPR and E47-TALE-reporter. (b) Cells cotransfected with E47-TALE1/2/3-VPR and HNF4 $\alpha$ -TALE-reporter.

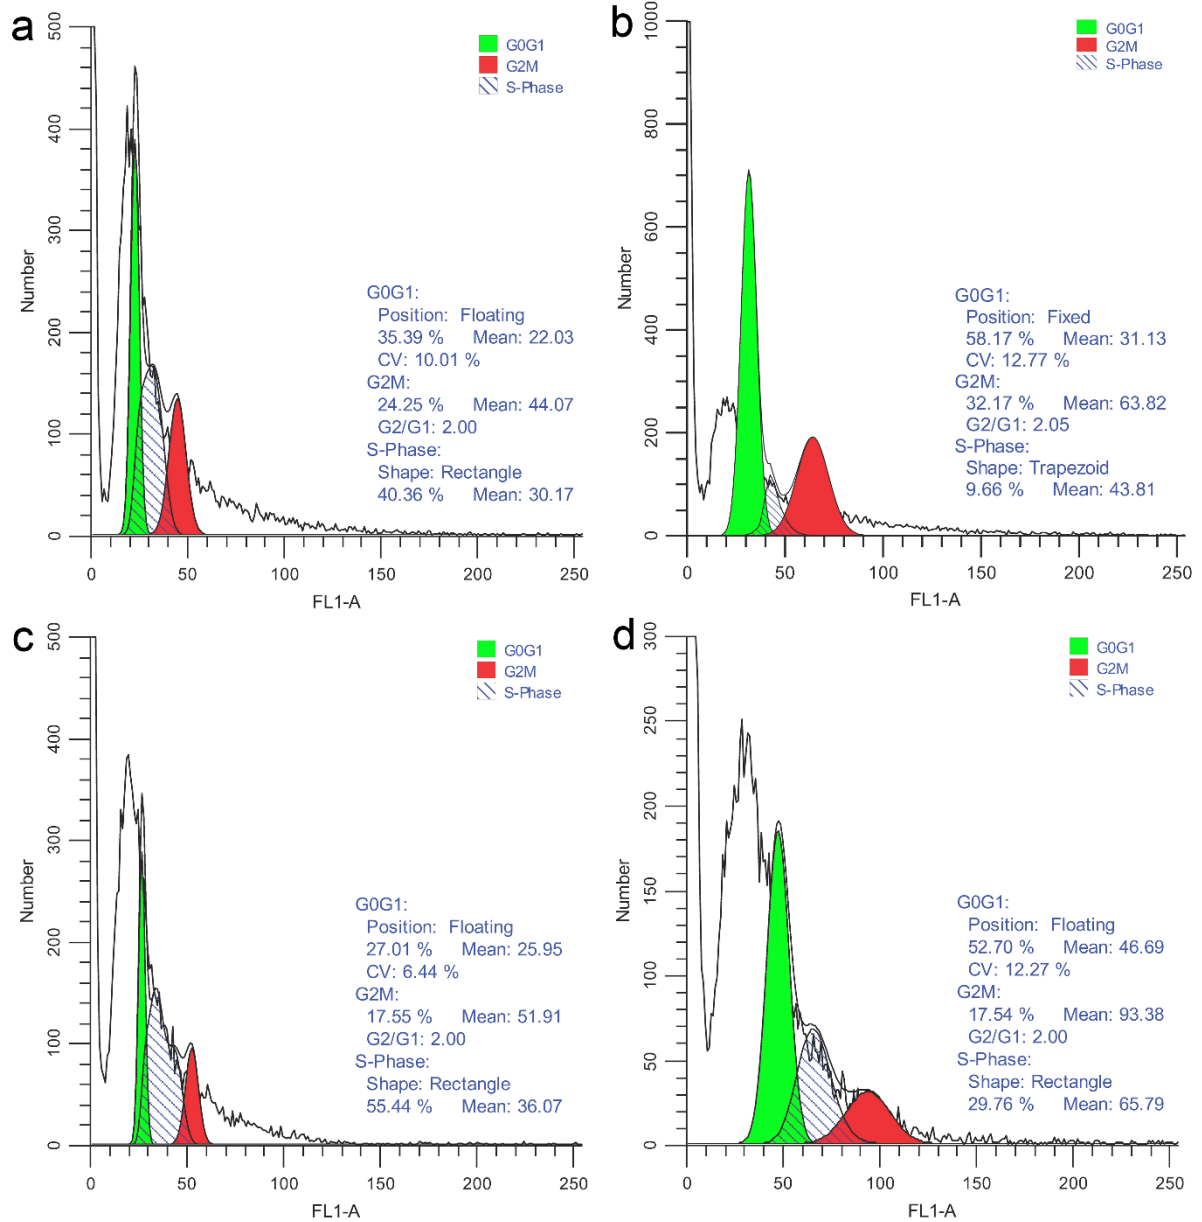

Figure S4. Detection of cell cycle with flow cytometry. (a) HepG2 treated by lipo. (b) HepG2 treated by lipo and HNF4 $\alpha$ -TALE1-VPR. (c) PANC1 treated by lipo. (d) PANC1 treated by lipo and E47-TALE1-VPR.

## Vectors and their elements and sequences

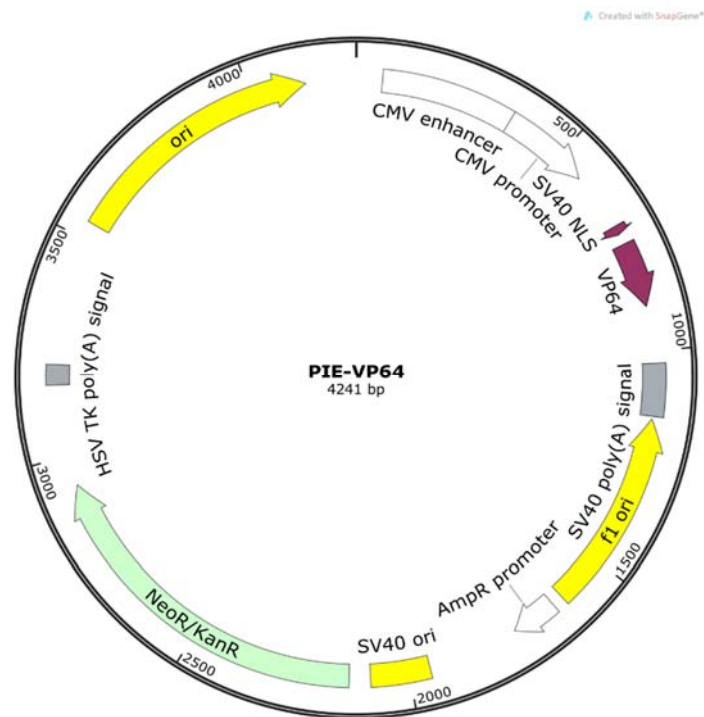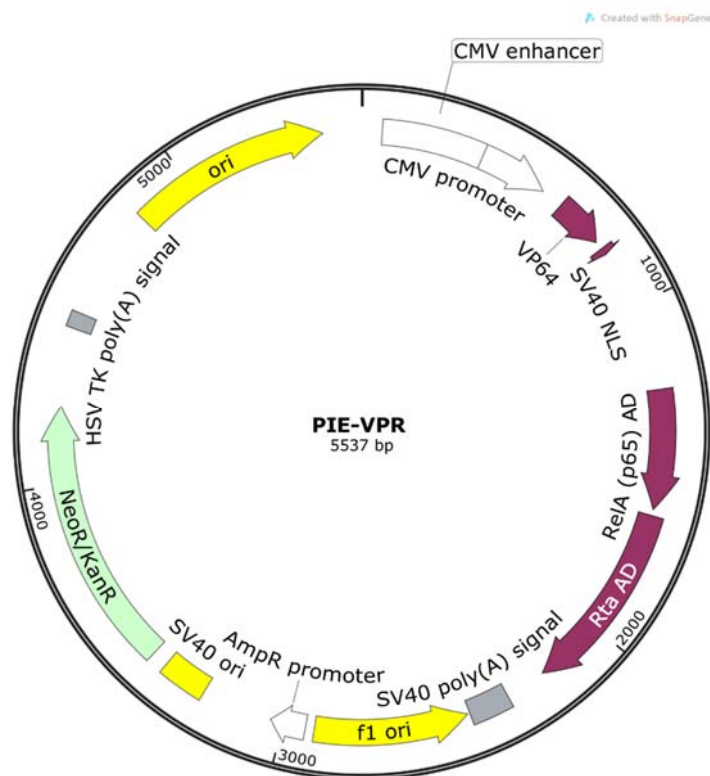

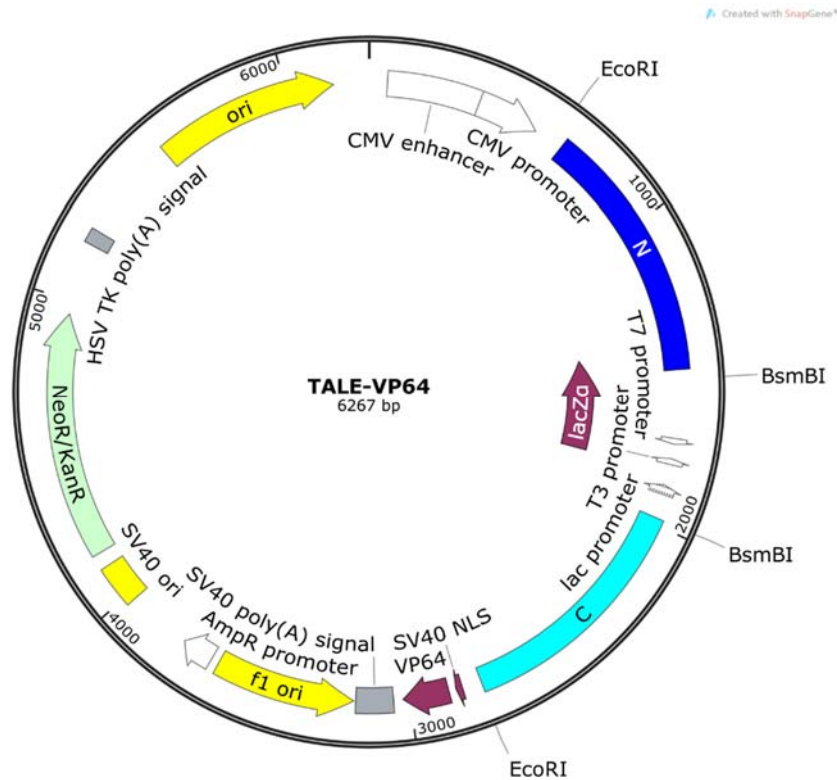

CMV enhancer + CMV promoter + N-term of TALE + Repeating sequence area of TALE instead of LacZα + C-term of TALE+VP64 (SV40NLS+VP64)

CGTTACATAACTTACGGTAAATGGCCCGCCTGGCTGACCGCCCAACGACCCCGCCATTGACG  
TCAATAATGACGTATGTTCCCATAGTAACGCCAATAGGGACTTTCCATTGACGTCAATGGGTGG  
AGTATTTACGGTAAACTGCCACTTGGCAGTACATCAAGTGTATCATATGCCAAGTACGCCCCCT  
ATTGACGTCAATGACGGTAAATGGCCCGCCTGGCATTATGCCAGTACATGACCTTATGGGACT  
TTCTACTTGGCAGTACATCTACGTATTAGTCATCGCTATTACCATGGTGATGCGGTTTTGGCAGT  
ACATCAATGGGCGTGGATAGCGGTTTGACTCACGGGGATTCCAAGTCTCCACCCCATGACGT  
CAATGGGAGTTTTGTTTTGGCACCAAATCAACGGGACTTTCCAAAATGTCGTAACAACCTCCGC  
CCCATTGACGCAAATGGGCGGTAGGCGTGTACGGTGGGAGGTCTATATAAGCAGAGCTATGGAT  
CCCATTTCGTCGCGCAGGCCAAGTCCTGCCCGGAGCTTCTGCCCGGACCCCAACCGGATAGG  
GTTCAGCCGACTGCAGATCGTGGGGTGTCTGCGCCTGCTGGCAGCCCTCTGGATGGCTTGCC  
GCTCGGCGGACGGTGTCCCGGACCCGGCTGCCATCTCCCCCTGCGCCCTCACCTGCGTTCTCG  
GCGGGCAGCTTCAGCGATCTGCTCCGTCCGTTTCGATCCGTCGTTCTTGATAACATCGCTTCTTGA  
TTCGATGCCTGCCGTCGGCACGCCGATACAGCGGCTGCCCCAGCAGAGTGGGATGAGGCGCA  
ATCGGCTCTGCGTGCAGCCGATGACCCGCCACCCACCGTGCCTGTCGCTGTCACTGCCGCGCG  
GCCGCCGCGCGCAAGCCGGCCCCGCGACGGCGTGTGCGCAACCCTCCGACGCTTCGCCGG  
CCGCGCAGGTGGATCTACGCAGCTCGGCTACAGTCAGCAGCAGCAAGAGAAGATCAAACCG  
AAGGTGCGTTTCGACAGTGGCGCAGCACCACGAGGCACTGGTGGGCCATGGGTTTACACACGC  
GCACATCGTTGCGCTCAGCCAACACCCGGCAGCGTTAGGGACCGTCGCTGTCACGTATCAGCA  
CATAATCACGGCGTTGCCAGAGGCGACACACGAAGACATCGTTGGCGTCGGCAAACAGTGGT  
CCGGCGCACGCGCCCTGGAGGCCTTGCTCACGGATGCGGGGAGTTGAGAGGTCCGCCGTTA  
CAGTTGGACACAGGCCAACTTGTGAAGATTGCAAACCGTGGCGGCGTGACCCGAATGGAGGC  
AGTGCATGCCCTGGAGACGGGCGCCGCTACAGGGCGCGTCCCATTCGCCATTCAGGCTGCGCA  
ACTGTTGGGAAGGGCGATCGGTGCGGGCCTCTTCGCTATTACGCCAGCTGGCGAAAGGGGGAT

GTGCTGCAAGGCGATTAAGTTGGGTAACGCCAGGGTTTTCCAGTCACGACGTTGTA AACGA  
CGGCCAGTGAGCGCGCGTAATACGACTCACTATAGGGCGAATTGGGTACGGGCCCCCCTCG  
AGGTCCCTCCAGCTTTTGTTCCTTTAGTGAGGGTTAATTGCGCGCTTGGCGTAATCATGGTCATA  
GCTGTTTCCTGTGTGAAATTGTTATCCGCTCACAATTCCACACAACATACGAGCCGGAAGCATA  
AAGTGTA AACGCTGGGGTGCCTAATGAGTGAGCTAACTCACATTAATTGCGTTGCGCTCACTGC  
CCGTTTTCCACCGGTCGTCTCCAACGACCACCTCGTCGCCTTGGCCTGCCTCGGCGGACGTCC  
TGCCATGGATGCAGTGAAAAAGGGATTGCCGCACGCGCCGGAATTGATCAGAAGAGTCAATCG  
CCGTATTGGCGAACGCACGTCCCATCGCGTTGCCGACTACGCGCAAGTGGTTCGCGTGCTGGA  
GTTTTTCCAGTGCCACTCCCACCCAGCGTACGCATTTGATGAGGCCATGACGCAGTTCGGGATG  
AGCAGGAACGGGTTGGTACAGCTCTTTCGCAGAGTGGGCGTCACCGAACTCGAAGCCCGCGG  
TGGAACGCTCCCCCAGCCTCGCAGCGTTGGGACCGTATCCTCCAGGCATCAGGGATGAAAAG  
GGCCAAACCGTCCCCTACTTCAGCTCAAACACCGGATCAGGCGTCTTTGCATGCATTCGCCGAT  
TCGCTGGAGCGTGACCTTGATGCGCCCAGCCCAATGCACGAGGGAGATCAGACGCGGGCAAG  
CAGCCGTAAACGGTCCCGATCGGATCGTGCTGTCACCGGCCCTCCGCACAGCAGGCTGTCGA  
GGTGC GCGTTCCCGAACAGCGCGATGCGCTGCATTTGCCCTCAGCTGGAGGGTAAAACGCC  
GCGTACCAGGATCTGGGGCGGCCTCCCGGATCCTGGTACGCCATGGCTGCCGACCTGGCAGC  
GTCCAGCACCGTGATGTGGGAACAAGATGCGGACCCCTTCGCAGGGGCAGCGGATGATTTCCC  
GGCATTCAACGAAGAGGAACTCGCATGGTTGATGGAGCTATTGCCTCAGAAGAGCGCTGGAGG  
AGGTGGAAGCGGAGGAGGAGGAAGCGGAGGAGGAGGTAGCGGACCTAAGAAAAAGAGGAA  
GGTGGCCGCTGCTGGCTCTGGACGGGCTGACGCATTGGACGATTTTGATCTGGATATGCTGGGA  
AGTGACGCCCTCGATGATTTTGACCTTGACATGCTTGGTTCGGATGCCCTTGATGACTTTGACC  
TCGACATGCTCGGCAGTGACGCCCTTGATGATTTGACCTGGACATGCTGATTA ACTGA



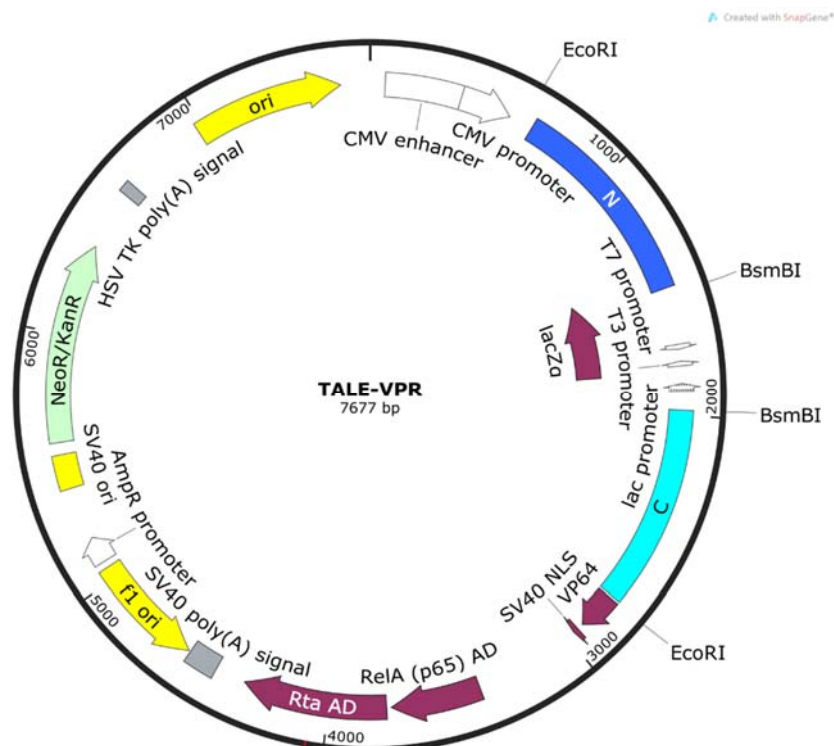

CMV enhancer + CMV promoter + N-term of TALE + Repeating sequence area of TALE instead of LacZα + C-term of TALE + VPR (VP64+SV40 NLS + Rel A(p65)AD + RtaAD)

CGTTACATAACTTACGGTAAATGGCCCGCCTGGCTGACCGCCCAACGACCCCGCCATTGACG  
TCAATAATGACGTATGTTCCCATAGTAACGCCAATAGGGACTTTCCATTGACGTCAATGGGTGG  
AGTATTACGGTAAACTGCCCACTTGGCAGTACATCAAGTGTATCATATGCCAAGTACGCCCCCT  
ATTGACGTCAATGACGGTAAATGGCCCGCCTGGCATTATGCCCAGTACATGACCTTATGGGACT  
TTCCTACTTGGCAGTACATCTACGTATTAGTCATCGCTATTACCATGGTGATGCGGTTTTGGCAGT  
ACATCAATGGGCGTGGATAGCGGTTTGACTCACGGGGATTTCOAAGTCTCCACCCCATGACGT  
CAATGGGAGTTTTGTTTTGGCACAAAATCAACGGGACTTTCCAAAATGTCGTAACAACTCCGC  
CCCATTGACGCAAATGGGCGGTAGGCGTGTACGGTGGGAGGTCTATATAAGCAGAGCTATGGAT  
CCCATTTCGTCGCGCAGGCCAAGTCCTGCCCGGAGCTTCTGCCCGGACCCCAACCGGATAGG  
GTTGACCCGACTGCAGATCGTGGGGTGTCTGCGCCTGCTGGCAGCCCTCTGGATGGCTTGCC  
GCTCGGCGGACGGTGTCCCGGACCCGGCTGCCATCTCCCCTGCGCCCTCACCTGCGTTCTCG  
GCGGGCAGCTTCAGCGATCTGCTCCGTCCGTTTCGATCCGTCGTTCTTGATAACATCGTTCTTGA  
TTCGATGCCTGCCGTCGGCACGCCGCATACAGCGGCTGCCCCAGCAGAGTGGGATGAGGCGCA  
ATCGGCTCTGCGTGCAGCCGATGACCCGCCACCCACCGTGCCTGTCGCTGTCACTGCCGCGCG  
GCCCGCGCGCCAAGCCGGCCCCGCGACGGCGTGTGCGCAACCCTCCGACGCTTCGCCCGG  
CCGCGCAGGTGGATCTACGCACGCTCGGCTACAGTCAGCAGCAGCAAGAGAAGATCAAACCG  
AAGGTGCGTTCGACAGTGGCGCAGCACCACGAGGCACTGGTGGGCCATGGGTTTACACACGC  
GCACATCGTTGCGCTCAGCCAACACCCGGCAGCGTTAGGGACCGTCGCTGTCACGTATCAGCA  
CATAATCACGGCGTTGCCAGAGGCGACACACGAAGACATCGTTGGCGTCGGCAAACAGTGGT  
CCGCGCACGCGCCCTGGAGGCCTTGCTCACGGATGCGGGGAGTTGAGAGGTCCGCCGTTA  
CAGTTGGACACAGGCCAACTTGTGAAGATTGAAAACGTGGCGGCGTGACCGCAATGGAGGC  
AGTGCATGCCCTGGAGACGGGCGCGCTACAGGGCGCGTCCATTGCCATTCAGGCTGCGCA



ACTGTTGGGAAGGGCGATCGGTGCGGGCCTCTTCGCTATTACGCCAGCTGGCGAAAGGGGGAT  
GTGCTGCAAGGCGATTAAGTTGGGTAACGCCAGGGTTTTCCAGTCACGACGTTGTAAAACGA  
CGGCCAGTGAGCGCGCTAATACGACTCACTATAGGGCGAATTGGGTACCGGGCCCCCCTCG  
AGGTCTCCAGCTTTTGTTCCTTTAGTGAGGGTTAATTGCGCGCTTGGCGTAATCATGGTCATA  
GCTGTTTCCTGTGTGAAATTGTTATCCGCTCACAATTCCACACAACATACGAGCCGGAAGCATA  
AAGTGAAAGCCTGGGGTGCCTAATGAGTGAGCTAACTCACATTAATTGCGTTGCGCTCACTGC  
CCGTTTTCCACCGGTCGTCTCCAACGACCACCTCGTCGCCTTGGCCTGCCTCGGCGGACGTCC  
TGCCATGGATGCAGTGAAAAAGGGATTGCCGCACGCGCCGGAATTGATCAGAAGAGTCAATCG  
CCGTATTGGCGAACGCACGTCCCATCGCGTTGCCGACTACGCGCAAGTGGTTCGCGTGCTGGA  
GTTTTTCCAGTGCCACTCCCACCCAGCGTACGCATTTGATGAGGCCATGACGCAGTTCGGGATG  
AGCAGGAACGGGTTGGTACAGCTCTTTCGCAGAGTGGGCGTCACCGAACTCGAAGCCCGCGG  
TGGAACGCTCCCCCAGCCTCGCAGCGTTGGGACCGTATCCTCCAGGCATCAGGGATGAAAAG  
GGCCAAACCGTCCCCTACTTCAGCTCAAACACCGGATCAGGCGTCTTTGCATGCATTCGCCGAT  
TCGCTGGAGCGTGACCTTGTGCGCCCAGCCCAATGCACGAGGGAGATCAGACGCGGGCAAG  
CAGCCGTAAACGGTCCCGATCGGATCGTGCTGTCACCGGCCCTCCGCACAGCAGGCTGTCGA  
GGTGCGCGTTCCCGAACAGCGCGATGCGCTGCATTTGCCCTCAGCTGGAGGGTAAAACGCCC  
GCGTACCAGGATCTGGGGCGGCCTCCCGATCCTGGTACGCCATGGCTGCCGACCTGGCAGC  
GTCCAGCACCGTGATGTGGGAACAAGATGCGGACCCCTTCGCAGGGGCAGCGGATGATTTCC  
GGCATTCAACGAAGAGGAACTCGCATGGTTGATGGAGCTATTGCCTCAGAAGGACGCATTGGA  
CGATTTTGATCTGGATATGCTGGGAAGTGACGCCCTCGATGATTTGACCTTGACATGCTTGGTT  
CGGATGCCCTTGATGACTTTGACCTCGACATGCTCGGCAGTGACGCCCTTGATGATTTGACCT  
GGACATGCTGATTAAGTCTAGAAGTCCGGATCTCCGAAAAGAAAACGCAAAGTTGGTAGCCA  
GTACCTGCCCGACACCGACGACCGGCACCGGATCGAGGAAAAGCGGAAGCGGACCTACGAGA  
CATTCAAGAGCATCATGAAGAAGTCCCCCTCAGCGGCCCCACCGACCTAGACCTCCACCTA  
GAAGAATCGCCGTGCCAGCAGATCCAGCGCCAGCGTGCCAAAACCTGCCCCCAGCCTTACC  
CCTTACCAGCAGCCTGAGCACCATCAACTACGACGAGTTCCCTACCATGGTGTTCCCCAGCG  
GCCAGATCTCTCAGGCCTCTGCTCTGGCTCCAGCCCCTCCTCAGGTGCTGCCTCAGGCTCCTGC  
TCTTGACCAGCTCCAGCCATGGTGTCTGCACTGGCTCAGGCACCAGCACCCGTGCCTGTGCT  
GGCTCCTGGACCTCCACAGGCTGTGGCTCCACCAGCCCCTAACCTACACAGGCCGGCGAGG  
GCACACTGTCTGAAGCTCTGCTGCAGCTGCAGTTCGACGACGAGGATCTGGGAGCCCTGCTGG  
GAAACAGCACCGATCCTGCCGTGTTACCGACCTGGCCAGCGTGGACAACAGCGAGTTCCAG  
CAGCTGCTGAACCAGGGCATCCCTGTGGCCCCTCACACCACCGAGCCCATGCTGATGGAATAC  
CCCGAGGCCATCACCCGGCTCGTGACAGGCGCTCAGAGGCCTCCTGATCCAGCTCCTGCCCT  
CTGGGAGCACAGGCCTGCCTAATGGACTGCTGTCTGGCGACGAGGACTTCAGCTCTATCGCC  
GATATGGATTTCTCAGCCTTGCTGGGCTCTGGCAGCGGCAGCCGGGATTCCAGGGAAGGGATG  
TTTTTGCCGAAGCCTGAGGCCGGCTCCGCTATTAGTGACGTGTTGAGGGCCGCGAGGTGTGC  
CAGCCAAAACGAATCCGGCCATTTATCCTCCAGGAAGTCCATGGGCCAACCGCCCACTCCCC  
GCCAGCCTCGCACCAACACCAACCGGTCCAGTACATGAGCCAGTCGGGTCACTGACCCCGGC  
ACCAGTCCCTCAGCCACTGGATCCAGCGCCCGCAGTGACTCCCGAGGCCAGTCACCTGTTGGA  
GGATCCCGATGAGGAGACTAGCCAGGCTGTCAAAGCCCTTCGGGAGATGGCCGATACTGTGAT  
TCCCAGAAGGAAGAGGCTGCAATCTGTGGCCAAATGGACCTTTCCATCCGCCCCCAAGGGG  
CCATCTGGATGAGCTGACAACCACACTTGAGTCCATGACCGAGGATCTGAACCTGGACTCACC  
CCTGACCCCGGAATTGAACGAGATTCTGGATACTTCTGAACGACGAGTGCCTCTTGATGCC  
ATGCATATCAGCACAGGACTGTCCATCTTCGACACATCTCTGTTTGGCGCCGCGACTCTAGATC

ATAATCAGCCATACCACATTTGTAGAGGTTTTACTTGCTTTAAAAAACCTCCCACACCTCCCCCT  
 GAACCTGAAACATAA

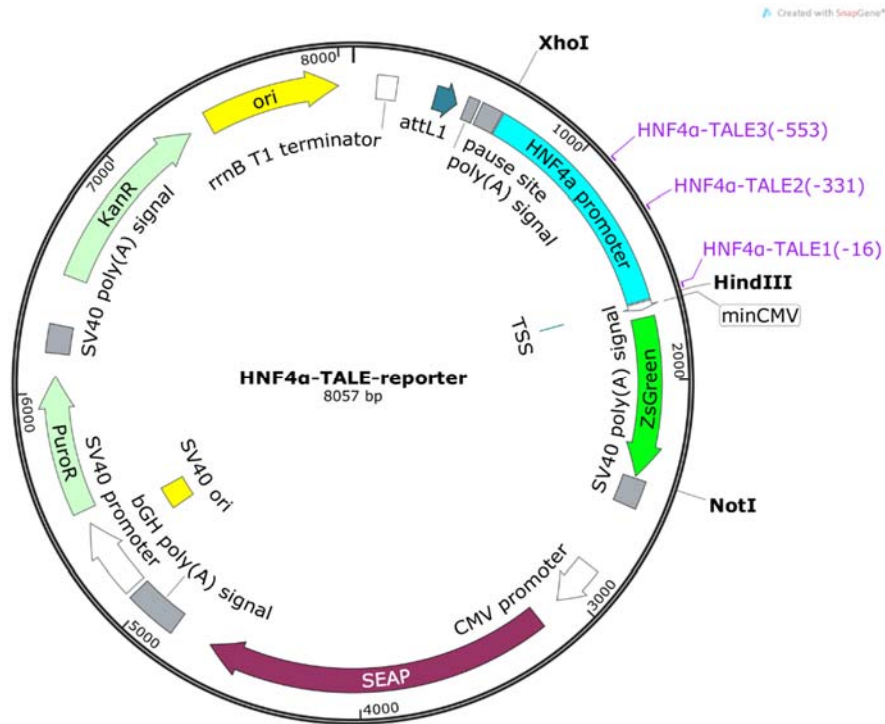

HNF4 $\alpha$  promoter+miniCMV+ZsGreen

TALE-binding sites are shown in highlight: TALE1, TALE2, and TALE3

TGAGATCCAAAAGTGGACAAAAGAAACGGGGCTGTCCAAAAAAGCTAGGTGGCAGG  
 TGTCTAACATGCCAGGGAGCTAAAACAGAGTGTGTGAGTTTCAGCAGCAGGTTGAATTTAGA  
 ATGGGGAAGGAGACCAGAGGAGACGCCAGACAGGATGACTTTGTCCCATTGGCCTGGAGGC  
 AGCCCCATGTTTCTCCACCCCTCATATCACTCACCAGTTTGTAAATAGTATCTTTGAATGACGAT  
 CTGATTAAGGTCCGTCTCCTCCATTAGTCCACAAGTTTCGGGGGTACATCTACTTTGCTCATT  
 CCATATCCCAGAGTCTAGCACAAGGCCTGGTACATAGTAGGTGCTCAATAAATATGTTAGAT  
 GAAAGGAAGATAACACCTCTATGTACTAGCAGTGAGACTCCAGGCATGCAATTTCTCTCCTC  
 CTTCAGTCCCTTCATCTCAAGGTTTAATTTAAATATGGTAACGCCTGTATGCAACTCCAGCAT  
 CCAGTAGGCACTCACTAAACACAGTTCTCCACCCTCCTTTTTCTCTGCCCTCCCTCGGTTT  
 TCCCCTACTTCTGCATGGTGACACACCATAGTTTGGAGCCATAAAACCAACCCAGGTTG  
 GACTCTCACCTCTCAGCCCTTCTGCTCCGGCCCTGTCTCAAATGGGGGGCTGATGTCCCC  
 ATACACCTGGCTCTGGGTTCCCCTAACCCAGAGTGCAGGACTAGGACCCGAGTGGACCTCA  
 GGTCTGGCCAGGTCGCCATTGCCATGGAGACAGCAACAGTCCCCAGCCGCGGGTTCCTAAG  
 TGACTGGTTACTCTTTAACGTATCCACCACCTTGGGTGATTAGAAGAATCAATAAGATAACC  
 GGGCGGTGGCAGCTGGCCGCACTCACCCTTCTGGTGGACGGGCTCCTGGTGGCTGTGCTG  
 CTGCTGTGAGCGGGCCCCTGCTCCTCCAAGCCCCAGCTCTCCGGCTGGGTGGGCTTTAGAGG  
 GTATATAATGGAAGCTCGACTTCAGATGGCCAGTCCAAGCACGGCCTGACCAAGGAGATG  
 ACCATGAAGTACCGCATGGAGGGCTGCGTGGACGGCCACAAGTTCGTGATCACCGGCGAGGG  
 CATCGGCTACCCCTTCAAGGGCAAGCAGGCCATCAACCTGTGCGTGGTGGAGGGCGGCCCT  
 TGCCCTTCGCCGAGGACATCTTGTCGCCGCCCTTCATGTACGGCAACCGCGTGTTCACCGAGT  
 ACCCCAGGACATCGTCGACTACTTCAAGAACTCTGCCCCGCCGGCTACACCTGGGACCGCT

CCTTCCTGTTCGAGGACGGCGCCGTGTGCATCTGCAACGCCGACATCACCGTGAGCGTGGAG  
 GAGAACTGCATGTACCACGAGTCCAAGTTCTACGGCGTGAACCTCCCCGCCGACGGCCCCGT  
 GATGAAGAAGATGACCGACAACCTGGGAGCCCTCCTGCGAGAAGATCATCCCCGTGCCCAAGC  
 AGGGCATCTTGAAGGGCGACGTGAGCATGTACCTGCTGCTGAAGGACGGTGGCCGCTTGCGC  
 TGCCAGTTCGACACCGTGTACAAGGCCAAGTCCGTGCCCGCAAGATGCCCGACTGGCACTT  
 CATCCAGCACAAGCTGACCCGCGAGGACCGCAGCGACGCCAAGAACCAGAAGTGGCACCTG  
 ACCGAGCACGCCATCGCCTCCGGTCCGCCTTGCCTAA

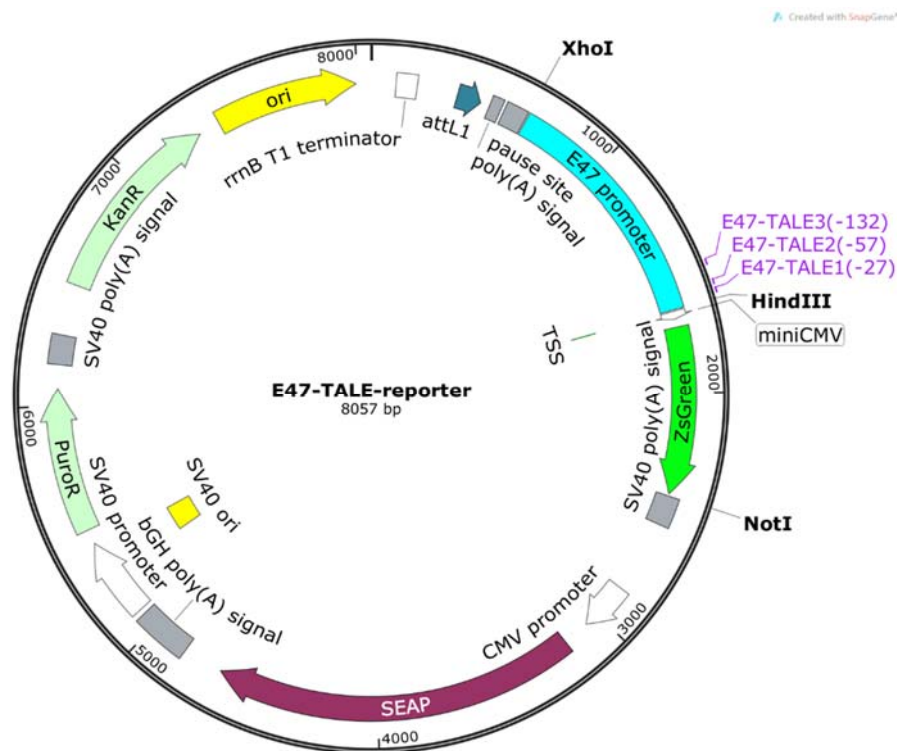

E47 promoter + miniCMV promoter + ZsGreen

TALE-binding sites are shown in highlight: TALE1, TALE2, and TALE3

GCTCAGTAGCCACCAACCACCTCTGCCAGTGCCTGTGCTGGCCCCAAGAGCCCTGGGCATA  
 CATCTCCTCACCCCTCCAGCCGACCAGCTCCCCACAGGCCTGGGTTTCGGGGTTAGAGTCAGGT  
 TGACTTCCCAGGCCAAAGGCGTGGTCAGGCTCTGCTCCCAACAGTATCACTCACTCCCCCTCT  
 TCCCAGGGTGCACCTTCTCTGCCCTGAAACCGCCCCCAGTTTATTACAACATCAGGCCAC  
 CCAGCATACTTCCCGCTCCAGCACAGCAGCAGACGTTACCAACAGGCCCCAGCCCCACAGTC  
 CAGGCAGTGCCAACCAGTCAGAGCTGGCGTACTCACAGACCCCTCTTCTGTTACTTTAGTG  
 AAGGACGAATGTTGCTCTGGGACCAAGGGAAGCTCAGCACTGGAAGATTGATTCCAGCTGGG  
 GAACAAGGGAGAAGGATGGGATGGGGTGTGGAGCTGGGGTTTTGATGGGTCGATAGGAGTT  
 TTCTGGATTAAGGAGGAAAAAGGTTTAGTAGGCAGAGCCAGATCCAAGTCTCAAGTACAAA  
 GGTCAGAAGTTCAGGGAGGCGGGAGGTGGGGGCTGGAAAAGGAGTAGGAGAGAGAGACCA  
 GGACATCATAAGAACCTCAAACCTGGCCAGGGGCTGGGATTTACCTAAAGGGGGGTGGCTTT  
 ACAGGGAAGGGAACGGGGTGGTAGATGTGCTACCAGGAGGGACAGGAGGCCGCAAGGT  
 GCATGGGCTGATCGTGGTCCCTCCGTCTGACTGCACCCCCACCGCCCCACCCGCCCCGAGGT  
 GTACCCACCCAGCTCAGGTGAGGACTACGGCAGGGATGCCACCGCCACCCGTCGCCAAGA

CCCCAGCAGCACCTATCCCGCCCCCTTCTACGTGGCAGGTACATGGCAGGGCGGGGGGCG  
CCAGGGACGGTAGGGCAGGGCTGGGGTCCCCACTCGGGCCCCACCTTACCAGCTCCCCTCC  
ACAGATAGAGGGTATATAATGGAAGCTCGACTTCCAGATGGCCCAGTCCAAGCACGGCCTGA  
CCAAGGAGATGACCATGAAGTACCGCATGGAGGGCTGCGTGGACGGCCACAAGTTCGTGATC  
ACGGCGAGGGCATCGGCTACCCCTTCAAGGGCAAGCAGGCCATCAACCTGTGCGTGGTGGA  
GGGCGGCCCTTGCCCTTCGCCGAGGACATCTTGTCCGCCCTTCATGTACGGCAACCGCGT  
GTTACCGAGTACCCCCAGGACATCGTCGACTACTTCAAGAACTCCTGCCCCGCCGGCTACAC  
CTGGGACCGCTCCTTCTGTTCGAGGACGGCGCCGTGTGCATCTGCAACGCCGACATCACCGT  
GAGCGTGGAGGAGAACTGCATGTACCACGAGTCCAAGTCTACGGCGTGA ACTTCCCCGCCG  
ACGGCCCCGTGATGAAGAAGATGACCGACA ACTGGGAGCCCTCCTGCGAGAAGATCATCCCC  
GTGCCAAGCAGGGCATCTTGAAGGGCGACGTGAGCATGTACCTGCTGCTGAAGGACGGTGG  
CCGCTTGCCTGCCAGTTCGACACCGTGTACAAGGCCAAGTCCGTGCCCCGCAAGATGCCCG  
ACTGGCACTTCATCCAGCACAAAGCTGACCCGCGAGGACCGCAGCGACGCCAAGAACCAGAA  
GTGGCACCTGACCGAGCACGCCATCGCCTCCGGCTCCGCCTTGCCCTAA
